# Supplementary material for: Scavenger receptor-C acts as a receptor for Bacillus thuringiensis vegetative insecticidal protein Vip3Aa and mediates the internalization of Vip3Aa via endocytosis
Source: PubMed Central journal article supplement (PMC6191154; doi:10.1371/journal.ppat.1007347), 2018-10-04
Supplement: ppat.1007347.s008.pdf [file ppat.1007347.s008.pdf]

**S1 Table: Primers used in this study**

| Primer name   | Sequence(5'→3')                                                             | Function         |
|---------------|-----------------------------------------------------------------------------|------------------|
| Vip-F         | TACCATGGTAATGAACAAGAATAATACTAAATTAAGCAC                                     | Vip cloning      |
| Vip-R         | TTCTCGAGCTTAATAGAGACATCGTAAAAATGTAC                                         | Vip cloning      |
| Vip-flag-F    | ACTTTAAGAAGGAGATATACCATGGTAATGAACAAGAATAACT<br>AAATTAAGC                    | Vip-flag cloning |
| Vip-flag-R    | GTGGTGGTGGTGGTGGTGGTCTTATCGTCGTCATCCTTGTAATCCTTA<br>ATAGAGACATCGTAAAAATGTAC | Vip-flag cloning |
| Vip-RFP-Up-F  | ACTTTAAGAAGGAGATATACATGAACAAGAATAATACTAAATTAAGC                             | Vip-RFP cloning  |
| Vip-RFP-Up-R  | AGGCCTGCATCTTAATAGAGACATCGTAAAAATG                                          | Vip-RFP cloning  |
| Vip-RFP-Do-F  | CTCTATTAAGATGCAGGCCTCTGCAGTCGACGGGCC                                        | Vip-RFP cloning  |
| Vip-RFP-Do-R  | GTGGTGGTGGTGGTGGTGCACACTAGTCTTGACAGCTCGTCCATGC                              | Vip-RFP cloning  |
| RFP-F         | CAAGAGCTCATGCAGGCCTCTGCAGTCGACGGGC                                          | RFP cloning      |
| RFP-R         | CGAAAGCTTCTAGATCCAATGACTCTAGATTCG                                           | RFP cloning      |
| Sf-CCP-F      | ACACCATGGCATAACCGGCTTCAACATGTCCGAT                                          | Sf-CCP cloning   |
| Sf-CCP-R      | ACACTCGAGGCAGCCCGATTTGACACAAACGGGT                                          | Sf-CCP cloning   |
| Dm-CCP-F      | GCGCCATGGCACGATGTGAAAGATCTATAGATTTGG                                        | Dm-CCP cloning   |
| Dm-CCP-R      | ACACTCGAGGGGCCTCGCACATCCCCTACTG                                             | Dm-CCP cloning   |
| pIZT-SR-C-F   | TCGAATTTAAAGCTTGGTACAATGGTAATGTTTATTAAGTGTTTATTATT                          | Sf-SR-C cloning  |
| pIZT-SR-C-R   | AGGCTTACCTTCGAACCGCGGTTTCATCATCAACATCGGACTTGA                               | Sf-SR-C cloning  |
| SRi1-Up-F     | TCGAATTTAAAGCTTGGTACATGGGTAGTGTCTTTCTGTTTACCC                               | SR-C RNAi        |
| SRi1-Up-R     | CACATGTATGGAAGGTGGTCCCCCACTGCTCAAATAGG                                      | SR-C RNAi        |
| SRi1-Do-F     | CAGTGGGGGGACCACCTTCCATACATGTGGTAGTAAAAG                                     | SR-C RNAi        |
| SRi1-Do-R     | AATGGTGATGGTGATGATGAATGGGTAGTGTCTTTCTGTTTACCC                               | SR-C RNAi        |
| SRi2-Up-F     | TCGAATTTAAAGCTTGGTACTGCTGTCCAGACTTCTGGACG                                   | SR-C RNAi        |
| SRi2-Up-R     | CTAAACCTACACCTATACTGCAGACACTTCAATGGGCAT                                     | SR-C RNAi        |
| SRi2-Do-F     | AAGTGTCTGCAGTATAGGTGTAGGTTTAGGAGTAGGCTT                                     | SR-C RNAi        |
| SRi2-Do-R     | AATGGTGATGGTGATGATGATGCTGTCCAGACTTCTGGACGTCT                                | SR-C RNAi        |
| pAc -SR-C-F   | AGACCCCGGATCGGGGTACAATGGTAATGTTTATTAAGTGTTTATTATT                           | SR-C cloning     |
| pAc -SR-C-R   | AGGCTTACCTTCGAACCGCGGTTTCATCATCAACATCGGACTTGA                               | SR-C cloning     |
| pAc-Sf-S2-F   | AGACCCCGGATCGGGGTACAATGGCGGACGCAGCTCCAGCCGG                                 | Sf-S2 cloning    |
| pAc-Sf-S2-R   | AGGCTTACCTTCGAACCGCGGAGCCTTGAACCTCTGAGTAAGGGGAC                             | Sf-S2 cloning    |
| SR-C-N-F      | CTGTTCCAGGGGCCCTGGGATACTACCCGGCTTCAACATGTCCG                                | SR-C-N cloning   |
| SR-C-N-R      | TCAGTCACGATGCGGCCGCTCCTATCCACTCAGACCTCCAGATTTCTTC                           | SR-C-N cloning   |
| SR-F-1-F      | CTGTTCCAGGGGCCCTGGGATACTACCCGGCTTCAACATGTCCG                                | SR-F-1 cloning   |
| SR-F-1-R      | TCAGTCACGATGCGGCCGCTCCTATGACACTTTTGCTGAACTATCACG                            | SR-F-1 cloning   |
| SR-F-2-F      | CTGTTCCAGGGGCCCTGGGAACGGAATGTGACTTCGAGCTGCCGG                               | SR-F-2 cloning   |
| SR-F-2-R      | TCAGTCACGATGCGGCCGCTCCTAGAGCATGGCTTTGGTGCAGTTCTCC                           | SR-F-2 cloning   |
| SR-F-3-F      | CTGTTCCAGGGGCCCTGGGAGAAGCCACCACGCCACCAGCTGTT                                | SR-F-3 cloning   |
| SR-F-3-R      | TCAGTCACGATGCGGCCGCTCCTATAATGTAGCTCCACTCAGACCTCC                            | SR-F-3 cloning   |
| Sf-actin-RT-F | TCCTCCGTCTGGACTTGCC                                                         | Actin qRT-PCR    |
| Sf-actin-RT-R | CTTCTCCTTGATGTCACGAACG                                                      | Actin qRT-PCR    |
| Sf-SR-RT-F    | ATGCTCGAAGCCACCACG                                                          | Sf-SR-C qRT-PCR  |
| Sf-SR-RT-R    | CGACGCAGACAATGCTACAAC                                                       | Sf-SR-C qRT-PCR  |

---

|               |                                                                      |                 |
|---------------|----------------------------------------------------------------------|-----------------|
| pET-SRi-Up-F  | AGCGGATAACAATTCCCCTCCTCGTTATACCCTGGTTGG                              | Se-SR-C RNAi    |
| pET-SRi-Up-R  | CAGATCGTAAATAGAGGTTGCAGCGTCCAACAC                                    | Se-SR-C RNAi    |
| pET-SRi-Do-F  | CAACCTCTATTTACGATCTGGAAATTATCACCG                                    | Se-SR-C RNAi    |
| pET-SRi-Do-R  | AGTGGTGGTGGTGGTGGTGCCTCCTCGTTATACCCTGGTTGG                           | Se-SR-C RNAi    |
| Hypi-Up-F     | AGCGGATAACAATTCCCCTAAGGTGCTCGGAGAAGGAGAG                             | pET-Hypi        |
| Hypi-Up-R     | CACAGCAACGAGGAGCACGCCGAACGACCAG                                      | pET-Hypi        |
| Hypi-Do-F     | GCGTGCTCCTCGTTGCTGTGGACATCCTTAGCC                                    | pET-Hypi        |
| Hypi-Do-R     | AGTGGTGGTGGTGGTGGTGAAGGTGCTCGGAGAAGGAGAG                             | pET-Hypi        |
| Se-actin-RT-F | ATCCTCCGTCTGGACTTGGC                                                 | Actin qRT-PCR   |
| Se-actin-RT-R | CTTCTCCTTGATGTCACGCACG                                               | Actin qRT-PCR   |
| Se-SR-RT-F    | AACCTATAACAGTGTCCGTTGAAG                                             | Se-SR-C qRT-PCR |
| Se-SR-RT-R    | AATGTTGCTCCACTCAGTCCTC                                               | Se-SR-C qRT-PCR |
| pJF-Sf-SR-C-F | ATCCTTTACTTCAGGCGGCCGCGGCTCGAGCAAATGTTTATTAA<br>GTGTTTATTATTTTTATTTG | Sf-SR-C cloning |
| pJF-Sf-SR-C-R | TCCTTCACAAAGATCCTCTAGATTATTCATCATCAACATCGGAC                         | Sf-SR-C cloning |

---
